# Supplementary material for: Concept Mapping to Define Components for an Occupation-Based Intervention for Parkinson’s Disease and Anxiety
Source: PubMed Central journal article supplement — J Parkinsons Dis. 2024 Jan 23;14(1):181–95. doi: 10.3233/JPD-230150 (PMC10836548; doi:10.3233/jpd-230150), 2024-01-23
Supplement: jpd-14-jpd230150-s001.pdf [file jpd-14-jpd230150-s001.pdf]

# Supplementary Material

## Concept Mapping to Define Components for an Occupation-Based Intervention for Parkinson's Disease and Anxiety

**Supplementary Table 1.** List of statements

| One thing that would help a person with Parkinson's to live well with anxiety might be... |                                                                                                          | Importance Scale<br>[2.2222]-[4.8000]<br>Median = 2.4<br>n = 46 | Feasibility Scale<br>[2.5152]-[4.5758]<br>Median = 2.2879<br>n = 33 |
|-------------------------------------------------------------------------------------------|----------------------------------------------------------------------------------------------------------|-----------------------------------------------------------------|---------------------------------------------------------------------|
| Full Map Go-Zone<br>R=0.44181457652678                                                    |                                                                                                          |                                                                 |                                                                     |
| #                                                                                         | Statements                                                                                               | Average Rating                                                  | Average Rating                                                      |
| 3                                                                                         | To have access to meditation classes.                                                                    | 3.4444                                                          | 3.3333                                                              |
| 5                                                                                         | Singing.                                                                                                 | 3.1957                                                          | 3.5152                                                              |
| 6                                                                                         | Going to a Parkinson's dance class.                                                                      | 2.8913                                                          | 2.9394                                                              |
| 8                                                                                         | Tai-chi.                                                                                                 | 3.0217                                                          | 3.3030                                                              |
| 11                                                                                        | Shiatsu.                                                                                                 | 2.5652                                                          | 2.8182                                                              |
| 12                                                                                        | Qi Gong.                                                                                                 | 2.6739                                                          | 2.7576                                                              |
| 14                                                                                        | Meditation.                                                                                              | 3.3636                                                          | 3.6250                                                              |
| 17                                                                                        | To get help with planning your finances.                                                                 | 3.2667                                                          | 3.1515                                                              |
| 18                                                                                        | One to one support to improve self-confidence.                                                           | 3.7333                                                          | 2.9394                                                              |
| 19                                                                                        | Small focus groups to improve self-confidence.                                                           | 3.4565                                                          | 3.2727                                                              |
| 29                                                                                        | Having a one-to-one session before joining a group.                                                      | 3.1087                                                          | 3.1818                                                              |
| 38                                                                                        | Free access to apps like headspace.                                                                      | 3.2391                                                          | 3.5152                                                              |
| 46                                                                                        | Using cognitive behavior therapy.                                                                        | 3.4667                                                          | 3.4375                                                              |
| 49                                                                                        | To increase assertiveness.                                                                               | 3.5000                                                          | 3.3226                                                              |
| 53                                                                                        | Mentor/lifestyle coaches who can advise on matters unrelated to medications.                             | 3.4565                                                          | 2.8485                                                              |
| 57                                                                                        | A matched and paired "Buddy" to discuss developments with.                                               | 3.6222                                                          | 2.9091                                                              |
| 63                                                                                        | A biofeedback gadget.                                                                                    | 2.9111                                                          | 2.6970                                                              |
| 64                                                                                        | Access to counselling outside normal working hours.                                                      | 3.4545                                                          | 2.5152                                                              |
| 72                                                                                        | Reviewing your diet with a specialist.                                                                   | 3.7111                                                          | 3.5152                                                              |
| 74                                                                                        | A blog/magazine to share experiences and good PD news for the local area.                                | 3.4348                                                          | 3.3939                                                              |
| 82                                                                                        | An app that can divert your attention when you feel anxious.                                             | 3.3696                                                          | 3.3333                                                              |
| 84                                                                                        | A little set of laminated cue cards that can be used as a calming strategy.                              | 2.7609                                                          | 3.5313                                                              |
| 87                                                                                        | Having immediate access to a calming phone app.                                                          | 3.0222                                                          | 3.5758                                                              |
| 88                                                                                        | Having a designated person to contact for reassurance in a moment of panic.                              | 3.7333                                                          | 2.9375                                                              |
| 93                                                                                        | A visual infographic with ideas and quick fixes for dealing with anxiety.                                | 3.3043                                                          | 3.3333                                                              |
| 96                                                                                        | The opportunity to talk openly in a group of people with Parkinson's led by an experienced group worker. | 3.5435                                                          | 3.3636                                                              |
| 100                                                                                       | Wearing an invisible disability lanyard when out.                                                        | 2.7333                                                          | 3.3030                                                              |
| 104                                                                                       | To write poetry.                                                                                         | 2.2222                                                          | 2.6970                                                              |
| 106                                                                                       | Intense exercise.                                                                                        | 3.4565                                                          | 3.2727                                                              |

|     |                                                                                              |        |        |
|-----|----------------------------------------------------------------------------------------------|--------|--------|
| 109 | Visualization.                                                                               | 3.1111 | 3.6250 |
| 110 | Swimming.                                                                                    | 3.0217 | 3.3636 |
| 112 | To meditate in a PD group.                                                                   | 2.7333 | 3.0000 |
| 113 | Doing yoga.                                                                                  | 3.3182 | 3.5152 |
| 115 | Literature you could give to an employer.                                                    | 3.2955 | 3.5758 |
| 117 | Having a "buddy" they can text or call when they're feeling particularly anxious.            | 3.7556 | 3.0909 |
| 9   | Timely access to services when needed.                                                       | 4.6304 | 3.4242 |
| 25  | To continue in any type of work for as long as possible.                                     | 3.8913 | 3.4545 |
| 26  | Having access to specialist outpatient services.                                             | 4.3778 | 3.4545 |
| 30  | Finding the right support group for you.                                                     | 4.1957 | 3.3030 |
| 34  | Having peer support.                                                                         | 3.9773 | 3.5455 |
| 37  | A designated phone line which you can call any time.                                         | 3.9130 | 3.0606 |
| 39  | Free person centered counselling as soon as diagnosed.                                       | 4.2609 | 2.9688 |
| 40  | Having a structured support network with a list of who is responsible for what.              | 3.8261 | 3.5455 |
| 41  | To have a dedicated helper who can get to know the patient individually.                     | 3.8261 | 2.8485 |
| 42  | Increasing general awareness of PD in society.                                               | 4.2000 | 3.6061 |
| 44  | To speak to other people with Parkinson's of a similar age and stage in disease.             | 4.0000 | 3.5758 |
| 50  | To manage potential causes.                                                                  | 4.1111 | 3.3939 |
| 51  | To identify potential causes.                                                                | 3.9333 | 3.4242 |
| 52  | To turn anxiety into a driver for action and motivation.                                     | 4.1333 | 3.2727 |
| 55  | Focused support with sleep problems.                                                         | 4.2727 | 3.6061 |
| 59  | Access to specialist fitness trainers who understand the physical effects of PD on the body. | 4.1957 | 3.1875 |
| 60  | A tool to help isolate the source of the anxiety.                                            | 3.8261 | 3.2424 |
| 66  | To make available counselling for more than the current allocation of 6 weeks.               | 4.2500 | 2.9394 |
| 67  | To ensure that GPs receive training in movement and non movement symptoms.                   | 4.4565 | 3.3333 |
| 69  | Having rapid access to a neurologist.                                                        | 4.1522 | 2.6970 |
| 75  | Access to qualified PD nurses for day to day support.                                        | 4.5000 | 3.3438 |
| 76  | To attend a specific Parkinson's exercise classes.                                           | 3.8261 | 3.6061 |
| 83  | Having a designated contact to talk through your feelings of anxiety.                        | 3.9348 | 3.0000 |
| 99  | Letting other people know how you feel.                                                      | 4.0000 | 3.5455 |
| 103 | Help easing back into it all in reconnecting after lockdown.                                 | 4.0435 | 3.3030 |
| 116 | Letting others know what makes me anxious.                                                   | 3.9130 | 3.5758 |
| 2   | To plan your day.                                                                            | 3.7442 | 4.1515 |
| 4   | Learning how to meditate at home for a few minutes each day.                                 | 3.6000 | 3.9394 |
| 7   | Listening to calming music.                                                                  | 3.6667 | 4.3939 |
| 20  | An app to take the person through a breathing exercise.                                      | 3.3478 | 4.0303 |
| 23  | Access to easy to understand books.                                                          | 3.2609 | 3.7576 |
| 32  | Having a favorite "comfort" book close by.                                                   | 2.8222 | 3.8788 |
| 58  | Strategies to help with eating in public.                                                    | 3.6304 | 3.7273 |
| 68  | Creating of a list of every day necessary activities.                                        | 3.5111 | 4.1212 |
| 86  | Having a practiced mantra to repeat when anxiety sets in.                                    | 3.2609 | 3.8485 |
| 89  | Play a game.                                                                                 | 2.9111 | 3.8182 |

|     |                                                                                                            |        |        |
|-----|------------------------------------------------------------------------------------------------------------|--------|--------|
| 90  | A reading list of recommended books on living with anxiety.                                                | 3.1778 | 4.0909 |
| 94  | Recorded relaxation messages that could be easily listened to.                                             | 3.2222 | 3.7879 |
| 95  | A card in your purse/ wallet with a preprepared mantra that can be read in moments of anxiety.             | 2.9111 | 4.0303 |
| 98  | To have a daily five to ten minute nap in the afternoon.                                                   | 3.1957 | 3.8788 |
| 118 | Using mindfulness.                                                                                         | 3.6818 | 4.0606 |
| 1   | To simplify your life.                                                                                     | 4.0000 | 3.8485 |
| 10  | Support to help people develop their own coping strategies.                                                | 4.2609 | 3.6667 |
| 13  | Exploring different ways to relax.                                                                         | 4.2609 | 4.2424 |
| 15  | Having knowledge about the condition.                                                                      | 4.5000 | 4.5455 |
| 16  | Knowing where to go to get specific information and support.                                               | 4.6000 | 4.2121 |
| 21  | To have a regular exercise routine you enjoy.                                                              | 4.5000 | 4.2121 |
| 22  | Breathing exercises to help you to relax.                                                                  | 4.2000 | 4.5758 |
| 24  | Access to easy to understand current research articles.                                                    | 3.8478 | 3.6667 |
| 27  | Taking time out of the day to relax.                                                                       | 4.3043 | 4.0606 |
| 28  | Get a medication review to make sure you are on the right ones.                                            | 4.5217 | 4.1212 |
| 31  | To think of ways that you can continue to interact with others e.g., online, face to face, by, phone, etc. | 4.0870 | 4.0909 |
| 33  | Doing things that make you laugh.                                                                          | 4.4348 | 4.0000 |
| 35  | Not putting off taking some rescue medication.                                                             | 3.9783 | 3.8182 |
| 36  | Engaging with a creative activity.                                                                         | 4.0222 | 3.8485 |
| 43  | Understanding the personal drivers that create anxiety.                                                    | 4.2609 | 3.7879 |
| 45  | Use the 5 A's; Acknowledge, Accept, Allow, Adapt, & Adjust.                                                | 3.8478 | 3.9394 |
| 47  | To engage in meaningful activities.                                                                        | 4.4222 | 4.0606 |
| 48  | To understand how cognition is affected by anxiety.                                                        | 4.1087 | 3.8788 |
| 54  | Planning for the future.                                                                                   | 4.1957 | 3.9394 |
| 56  | To develop coping strategies for social situations.                                                        | 4.3111 | 3.9394 |
| 61  | Honesty from PD clinicians about the likely progress of the condition in order to prepare mentally.        | 4.2609 | 3.7813 |
| 62  | Training in simple breathing techniques which can be used at any time.                                     | 4.1304 | 4.1515 |
| 65  | More support for newly diagnosed people.                                                                   | 4.5652 | 3.7879 |
| 70  | A booklet that guides users through changes they can make to live well with Parkinson's.                   | 4.0444 | 4.2424 |
| 71  | To live in the moment.                                                                                     | 4.4667 | 3.9697 |
| 73  | To practice clean sleeping habits.                                                                         | 4.1136 | 3.9063 |
| 77  | Keeping active.                                                                                            | 4.8000 | 4.3030 |
| 78  | Maintaining social interests e.g., sports.                                                                 | 4.5111 | 3.8788 |
| 79  | Access to up to date research.                                                                             | 4.0000 | 4.0909 |
| 80  | Having a balanced diet.                                                                                    | 4.2444 | 4.3030 |
| 81  | Better information and support regarding the later stages of Parkinson's Disease.                          | 4.0667 | 4.1212 |
| 85  | To devise a 5-minute exercise program that can be done anywhere.                                           | 3.8444 | 4.1515 |
| 91  | To take a walk in the open air if possible.                                                                | 4.4130 | 4.5152 |
| 92  | Encouragement to share anxiety with partners and close friends.                                            | 4.1304 | 3.8182 |
| 97  | To get involved in projects to advance the understanding, treatment, and elimination of Parkinson's.       | 4.1304 | 3.9697 |

|     |                                                                         |        |        |
|-----|-------------------------------------------------------------------------|--------|--------|
| 101 | Planning ahead to give yourself plenty of time.                         | 4.3696 | 4.3030 |
| 102 | Understanding how PD anxiety is different from other anxiety.           | 4.3333 | 3.8438 |
| 105 | To try new things.                                                      | 3.9783 | 3.6970 |
| 107 | Finding out what triggers your anxiety.                                 | 4.3913 | 3.8750 |
| 108 | Learning to live in the moment.                                         | 4.3261 | 4.1212 |
| 111 | Accepting my condition rather than being frustrated by what I can't do. | 4.4565 | 3.9688 |
| 114 | Trying not to do too much especially with time restraints               | 4.2222 | 3.9394 |
| 119 | Engaging in hobbies.                                                    | 4.3913 | 3.9091 |
